# Supplementary material for: Tin–lead halide perovskite solar cells with a robust hole transport layer
Source: Royal Society of Chemistry journal article supplement (doi:10.1039/d3ta07845k), 2024-01-01
Supplement: d3ta07845k1.pdf [file d3ta07845k1.pdf]

## Supporting Information

# Tin-Lead Halide Perovskite Solar Cells with a Robust Hole Transport Layer

*Chunyan Li<sup>a</sup>, Yao Zhang<sup>a</sup>, Haiyan Zhao<sup>a</sup>, Zhongxun Yu<sup>a</sup>, Jixiang Zhang<sup>a</sup>, Peng Zhang<sup>ab</sup>, Han Chen<sup>\*abc</sup>*

<sup>a</sup>State Key Laboratory of Metal Matrix Composites, Shanghai Jiao Tong University; Shanghai 200240, China.

<sup>b</sup>Joint Research Center for Clean Energy Materials, Shanghai Jiao Tong University; Shanghai 200240, China.

<sup>c</sup>Innovation Center for Future Materials, Zhangjiang Institute for Advanced Study, Shanghai Jiao Tong University; Shanghai 201203, China.

### **Corresponding Author**

\*chen.han@sjtu.edu.cn

## Experimental Section

### Materials:

Dimethylformamide (DMF, anhydrous 99.8%), dimethyl sulfoxide (DMSO, >99.9%), 1,2-dichlorobenzene (99%), methanol (MeOH, anhydrous 99.8%), ethylene glycol (EG, anhydrous 99.8%), ethyl acetate (EA, anhydrous 99.8%), ethylenediamine (EDA, 99%), SnI<sub>2</sub> (99.99%), SnF<sub>2</sub> (99%), cesium carbonate (99.9%), and glycine hydrochloride (GlyHCl, >99%) are purchased from Sigma-Aldrich. Toluene (99.5%) is obtained from Sinopharm. Lead iodide (PbI<sub>2</sub>, 99.99%) and ammonium thiocyanate (NH<sub>4</sub>SCN) is purchased from TCI. Formamidinium iodide (FAI) is purchased from Great Cell Solar Materials. C<sub>60</sub> is bought from Nano-C. Phenethylammonium-chloride (PEACl), phenyl-C<sub>61</sub>-butyric-acid-methyl-ester (PCBM), and cesium iodide (CsI) are purchased from Xi'an Yuri Solar. Bathocuproine (BCP) is obtained from Wako Chemical. Poly(3,4-ethylenedioxythiophene): poly(styrene sulfonate) (PEDOT:PSS, Clevious P VP AI 4083) was obtained from Heraeus.

### Solution preparation:

The CC-incorporated PEDOT:PSS was prepared by mixing refrigerated PEDOT:PSS dispersion (~5 °C) with the aqueous solution of cesium carbonate (50 mg/mL) in the volume ratio of 10: 1. The mixture was filtered through a 0.45 μm PVDF filter before use. For the control PEDOT:PSS HTL, the PEDOT:PSS dispersion was used directly after filtration.

The 1.8 M Rb<sub>0.03</sub>Cs<sub>0.2</sub>FA<sub>0.77</sub>Pb<sub>0.5</sub>Sn<sub>0.5</sub>I<sub>3</sub> tin-lead perovskite precursor was prepared by dissolving 11.5 mg of RbI, 93.6 mg of CsI, 238.4 mg of FAI, 414.9 mg of PbI<sub>2</sub>, 335.3 mg of SnI<sub>2</sub>, 14.1 mg of SnF<sub>2</sub>, 3 mg of NH<sub>4</sub>SCN, 3 mg of GlyHCl, and 1 mg of PEACl in 1 ml of DMF/DMSO (3:1 v/v). The precursor solution was heated at 50 °C overnight and filtered through a 0.22 μm PTFE filter before use.

### **Device fabrication:**

Patterned FTO substrates were sequentially cleaned using detergent, deionized water, acetone, and IPA under ultrasonication for 15 mins. After being dried by nitrogen flow, the substrates were treated with Ar/O<sub>2</sub> (flow ratio 1: 1) plasma for 5 mins. The PEDOT:PSS or CC-PEDOT:PSS dispersion was spin-coated onto the FTO substrates at 6000 rpm for 40 s. After air drying for 20 min, a mixed solvent of MeOH/EG (v/v 30: 1) was applied on the HTL and spin-coated at 6000 rpm for 30 s, followed by annealing at 160 °C for 20 min in air. The substrates were immediately transferred to the N<sub>2</sub>-filled glovebox after annealing. The perovskite precursor was spin-coated with a two-step spin-coating program. The first step was at 1000 rpm for 10 s with an acceleration of 200 rpm·s<sup>-1</sup>, and the second step was at 4000 rpm for 50 s with an acceleration of 1000 rpm·s<sup>-1</sup>. 200 μL of EA was dropped 10 s before the end of the spin, and then the substrates were annealed at 100 °C for 10 min. A 5 μg/mL solution of EDA in toluene was applied to the cooled perovskite films by spin coating at 5000 rpm for 30 s, followed by heating at 70 °C for 5 min. The PCBM (5mg/mL in 1,2-dichlorobenzene) is then deposited at 5000 rpm for 30 s, followed by heating at 70 °C for 5 min. C<sub>60</sub> (18 nm), BCP (7 nm), and Cu (100 nm) in sequential order were thermally evaporated in a vacuum chamber (< 3×10<sup>-4</sup> Pa).

### **Film Characterization:**

Absorption spectra were recorded by UV-vis-NIR spectrometer (PerkinElmer Lambda 750S). The SEM images were recorded by JSM-7800F (JEOL). The X-ray diffraction (XRD) was conducted using an X-ray diffractometer (Ultima IV) with Cu Kα radiation (λ=1.54 Å) at a scan speed of 5° min<sup>-1</sup>. X-ray photoelectron spectroscopy (XPS) measurements were performed on a Kratos AXIS Ultra DLD spectrometer by using an Al Kα X-ray source, and the spectra were calibrated with Au 4f<sub>7/2</sub> binding energy (84.0 eV). The Raman spectra were performed by HORIBA LabRAM HR Evolution. Ultraviolet photoelectron spectroscopy (UPS) spectra were

measured with an ESCALAB 250Xi (Thermo Scientific) with a He I $\alpha$  photon source (21.22 eV). Photoluminescence (PL) spectra and Time-Resolved Photoluminescence (TRPL) spectra were recorded by a steady-state transient fluorescence spectrometer (FLS1000). The Photoluminescence quantum yield (PLQY) was measured by mounting perovskite films in an integrating sphere. Atomic force microscopy (AFM) and conductive-AFM (C-AFM) were conducted on FastScan Bio (Bruker). Spectroscopic ellipsometry was conducted on a Semilab SE-2000 Ellipsometer. The wavelength range was 245.44-1597.01 nm and the angle of incidence was 75 °. The Cauchy model was used for the HTL layer and the Lorentz model was used for the FTO substrate. The ToF-SIMS were based on ION ToF SIMS 5-100 (Germany). A stable Ar ion beam was utilized as the ion beam for in-depth distribution with an analysis area of 100 $\times$ 100  $\mu\text{m}^2$ .

### **Device Characterization:**

$J$ - $V$  curves of the perovskite solar cells were measured with a Keithley 2400 source meter under simulated solar illumination at 100  $\text{mW}\cdot\text{cm}^{-2}$ , AM 1.5G standard air mass sunlight (Newport, Oriel Class A, 91195A), with anti-reflecting coating layers applied. The simulated light intensity was calibrated by a Si-reference cell.  $J$ - $V$  curves were measured by reverse scan (from 1.0 V to -0.1 V) and forward scan (from -0.1 V to 1.0 V) under a constant scan speed of 200  $\text{mV}\cdot\text{s}^{-1}$  (voltage steps of 10 mV and a delay time of 50 ms). A shadow mask was used to define the active area of the devices as 0.0916  $\text{cm}^2$ . External quantum efficiency was obtained using monochromatic incident light of  $1 \times 10^{16}$  photons  $\text{cm}^{-2}$  in direct current mode (CEP-2000BX, Bunko-Keiki). Space charge limited current (SCLC), dark  $J$ - $V$  curves, electrochemical impedance spectroscopy (EIS) and Mott-Schottky curves were collected on an electrochemical analysis instrument (Zahner, Germany). For dark current measurement, the voltage scanned from -0.6 to 1.0 V with the speed of 10  $\text{mV}\cdot\text{s}^{-1}$  in a dark box. For the Mott-Schottky

measurement, the voltage scanned from -0.1 to 1.0 V with the speed of 10 mV·s<sup>-1</sup> in a dark box.

The TRPL curves were fitted according to the equation  $y = y_0 + A_1 e^{-\frac{t}{\tau_1}} + A_2 e^{-\frac{t}{\tau_2}}$ , where  $A_1$  and  $A_2$  are the decay amplitudes,  $\tau_1$ , and  $\tau_2$  are the decay times and  $y_0$  is a constant for the baseline

offset. The average lifetime  $\tau_{ave}$  was calculated according to the equation  $\tau_{ave} = \frac{A_1 \tau_1^2 + A_2 \tau_2^2}{A_1 \tau_1 + A_2 \tau_2}$ .

The defect density obtained from SCLC measurements was calculated by the equation:

$N_{defects} = \frac{2\varepsilon\varepsilon_0 V_{TFL}}{eL^2}$ , where  $\varepsilon$  and  $\varepsilon_0$  are the dielectric constant and the vacuum permittivity, respectively,  $e$  is the unit charge, and  $L$  is the thickness of perovskite film.

The QFLS is calculated based on PLQY values by using the equation:

$QFLS = k_B T \ln(PLQY \times \frac{J_G}{J_{0,rad}})$ , where  $J_G$  is the generation current under one illumination (in this case approximated to the  $J_{sc}$ ), and  $J_{0,rad}$  is the radiative recombination current in the dark.

### **Stability measurements:**

For the shelf stability measurement, the unencapsulated devices were stored in the N<sub>2</sub>-filled glove box (H<sub>2</sub>O, <0.01 ppm; O<sub>2</sub>, <0.01 ppm) in the dark. For the thermal stability measurement, the unencapsulated devices were put on a hotplate at 85 °C in an N<sub>2</sub>-filled glove box (H<sub>2</sub>O, <0.01 ppm; O<sub>2</sub>, <0.01 ppm) in dark. For maximum power point tracking, an encapsulated device was operated at the  $V_{MPP}$  voltage (0.76 V) under AM1.5G 1-sun illumination, and the ambient temperature was 20-25 °C. The encapsulation was done by glass–glass sealing using UV epoxy resin.

### **Computational method:**

DFT calculations were conducted with the ORCA5.0.3 package<sup>1</sup>. Geometry optimization and single point energy were performed at the M06-2X<sup>2</sup>/Def2-TZVP<sup>3,4</sup> level of theory with D3zero<sup>5</sup> dispersion correction. Structure visualization was conducted by VMD<sup>6</sup>.

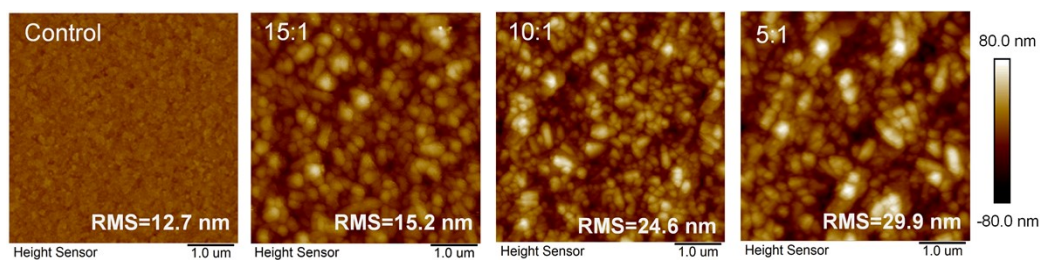

Figure S1. The AFM images of the PEDOT:PSS films with different concentrations of CC.

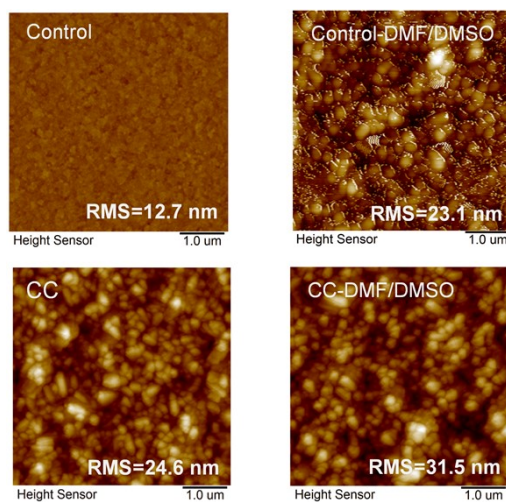

Figure S2. AFM morphologies of the control and CC HTL without and with DMF/DMSO treatment.

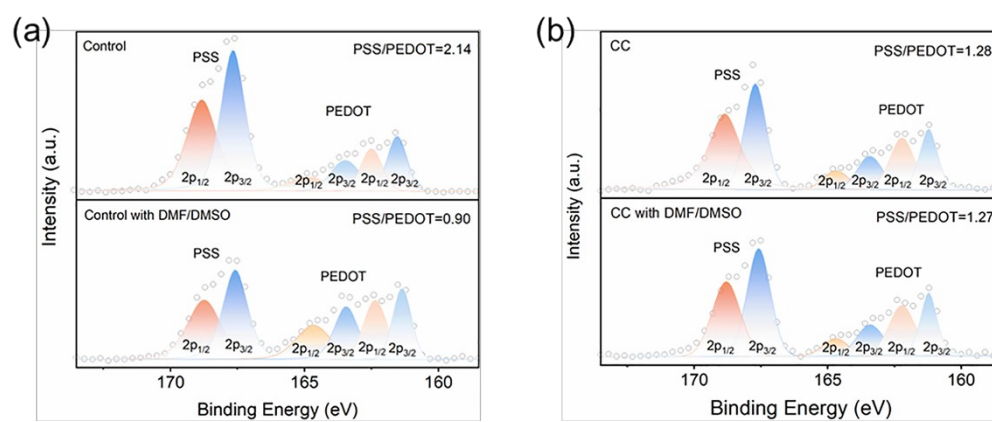

Figure S3. S 2p XRS spectra of the control and CC-PEDOT:PSS with and without DMF/DMSO treatment; see the fitting details in Table S1.

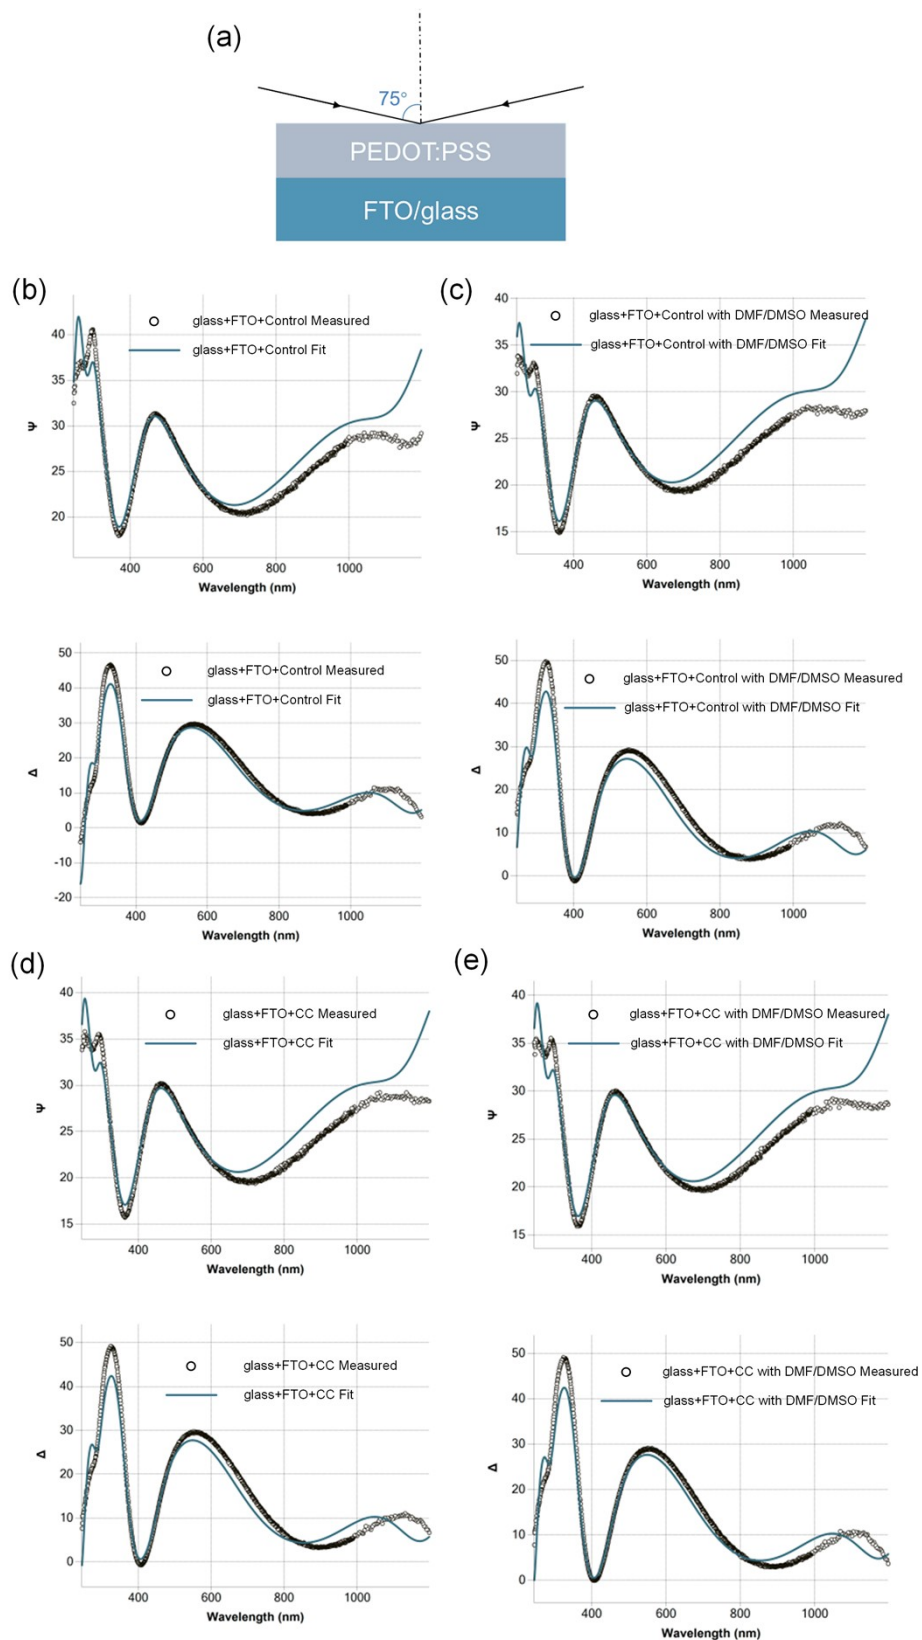

Figure S4. (a) Schematic of the measurements. Experimental and fitted ellipsometry spectra of (b, c) control PEDOT:PSS film and (d, e) CC-PEDOT:PSS film on FTO with and without DMF/DMSO treatment.



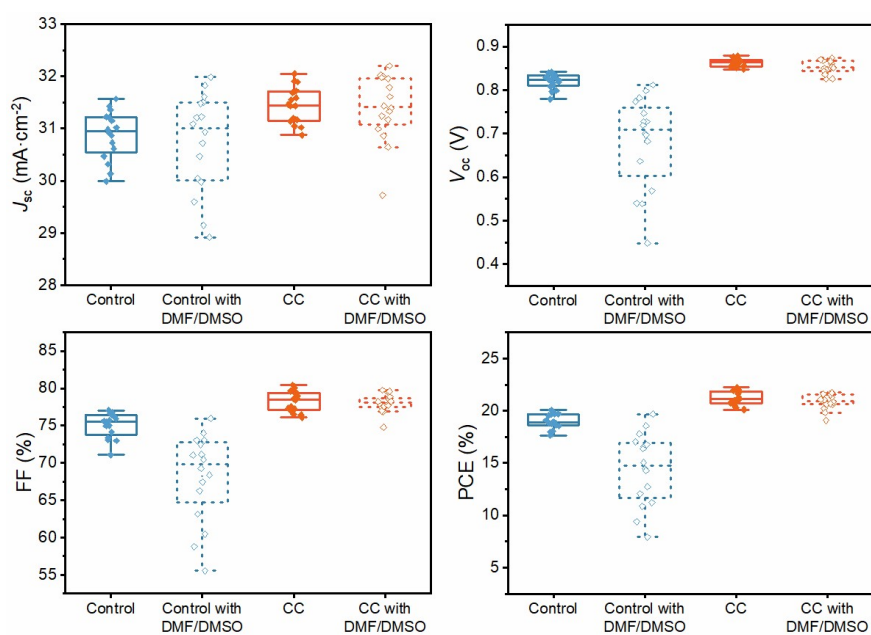

Figure S5. Box charts of PV parameters of devices using control PEDOT:PSS, PEDOT:PSS films with DMF/DMSO washing, CC-doped PEDOT:PSS and CC-doped PEDOT:PSS with DMF/DMSO washing. (These devices were fabricated in one batch)

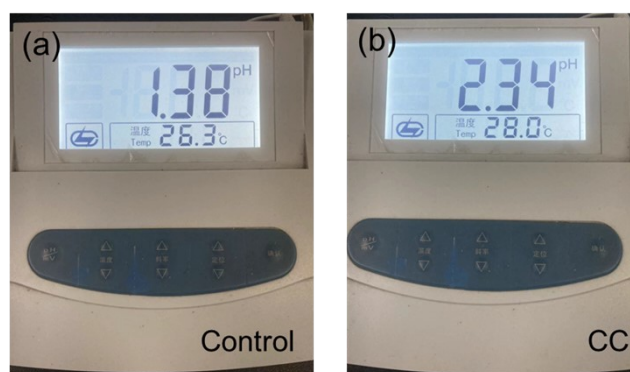

Figure S6. PH values of PEDOT: PSS and CC-PEDOT: PSS dispersion.

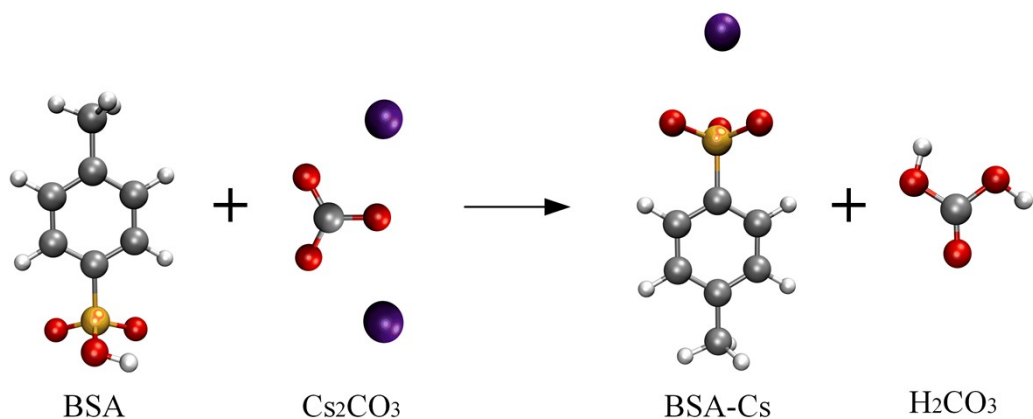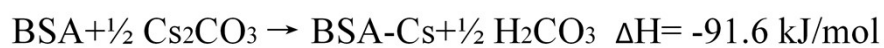

Figure S7. Schematic of the reaction mechanism calculated using DFT. (BSA: benzenesulfonic acid)

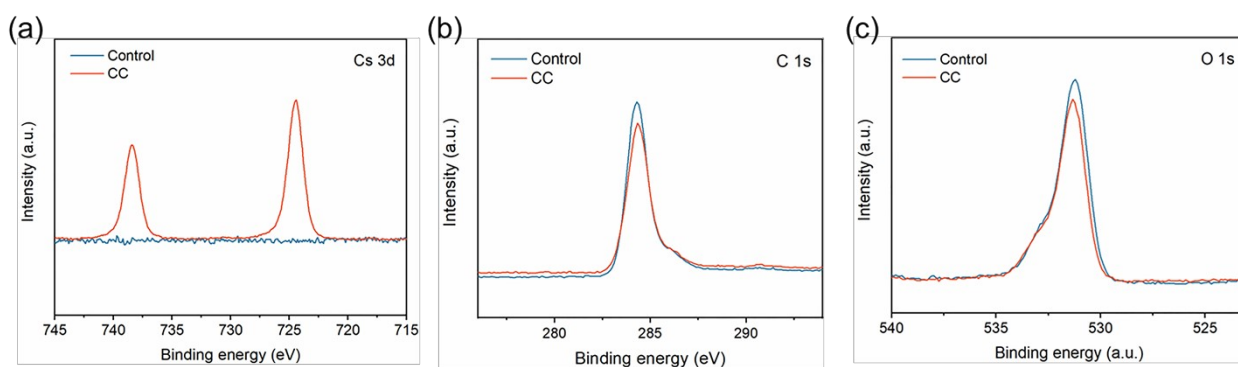

Figure S8. Cs 3d, C 1s, and O 1s core levels spectra of the control and CC-PEDOT:PSS layers.

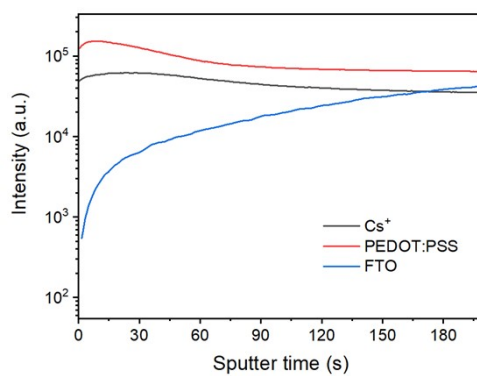

Figure S9. ToF-SIMS depth-profile analysis of the CC-PEDOT:PSS film.

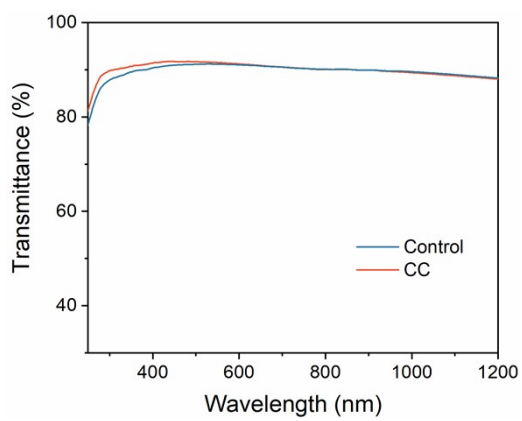

Figure S10. Transmittance spectra of control and CC-PEDOT:PSS films on FTO.

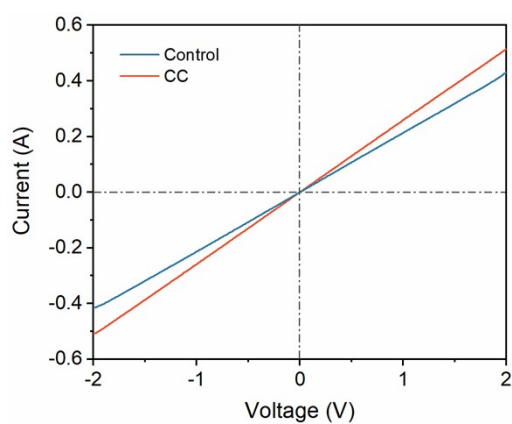

Figure S11. Current-voltage characteristics of FTO/PEDOT:PSS/Cu.

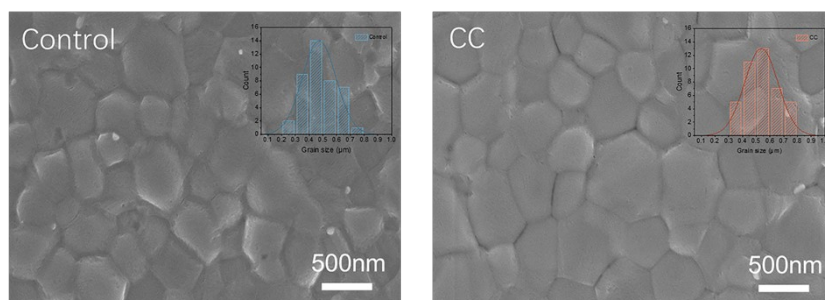

Figure S12. Top-view SEM images and grain size distribution (inset) of the perovskite films on the control and CC-PEDOT:PSS layers.

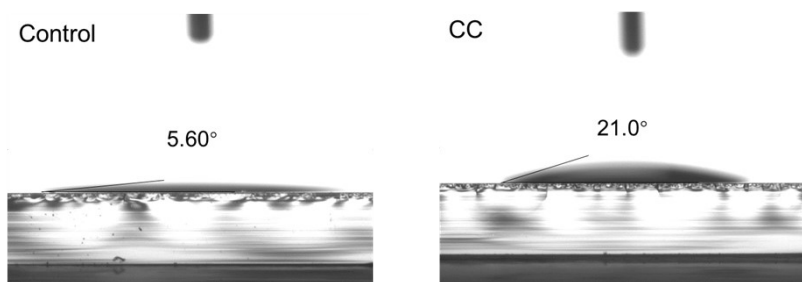

Figure S13. Contact angle images of perovskite precursor on the control and CC-PEDOT:PSS layers.

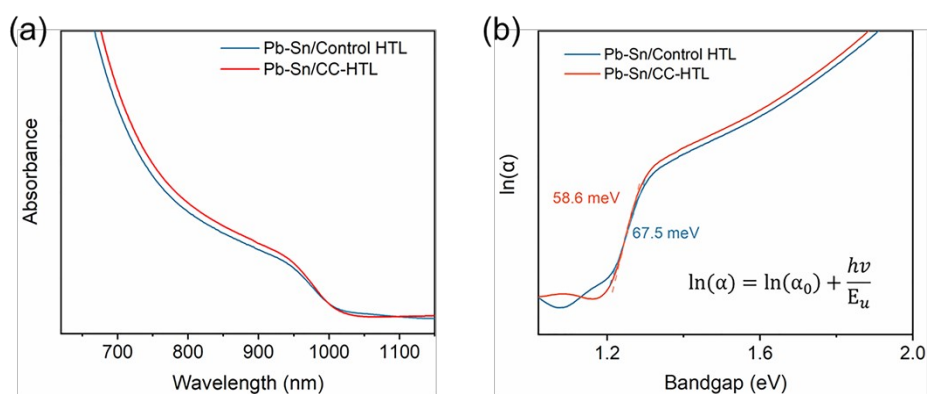

Figure S14. (a) UV-vis absorption spectra and (b) Urbach energy of perovskite film on control and CC-PEDOT:PSS layers.

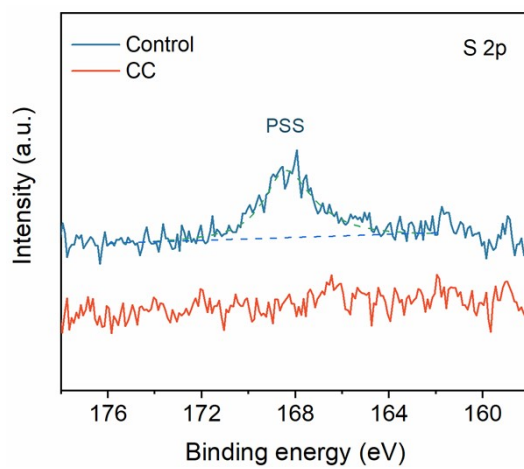

Figure S15. S 2p spectra of the peeled-off perovskite on control and CC-PEDOT:PSS films.

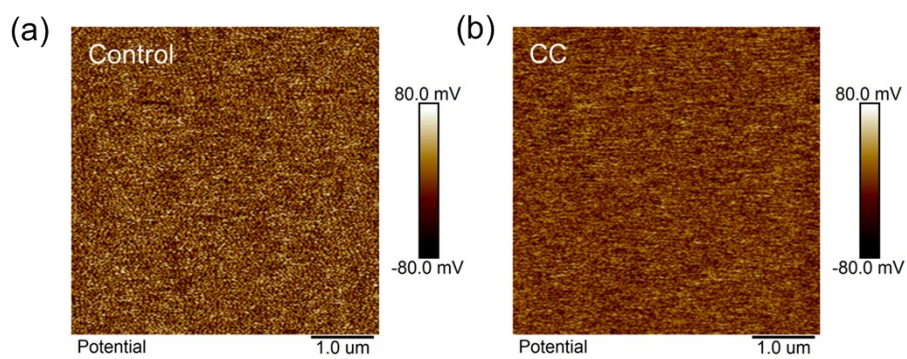

Figure S16. KPFM image of (a) control and (b) CC-PEDOT:PSS films.

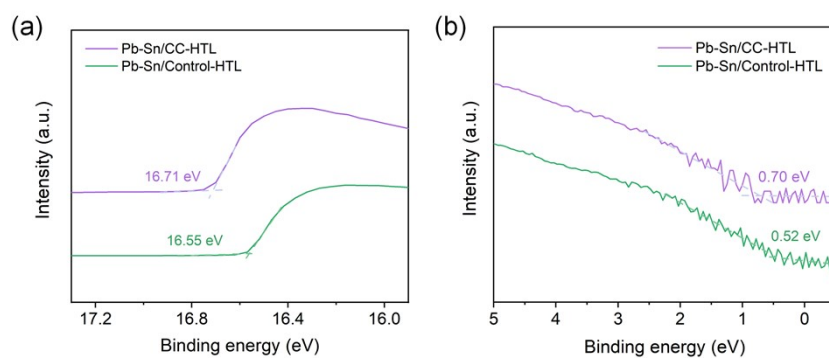

Figure S17. UPS spectra of the Pb-Sn perovskite on the control and CC-PEDOT:PSS layers, (a) cut-off region and (b) valence band edge region.

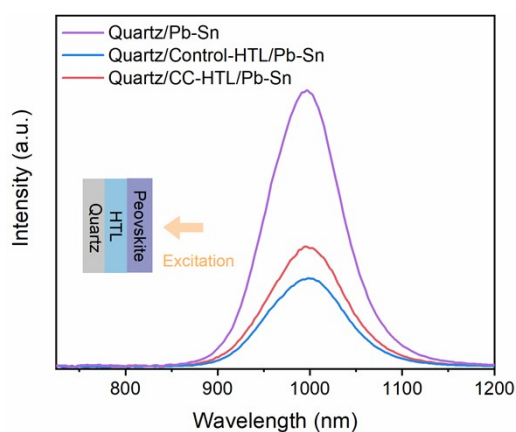

Figure S18. Steady-state PL spectra of neat perovskite film, perovskite/control HTL, and perovskite/CC-HTL were measured from the film side.

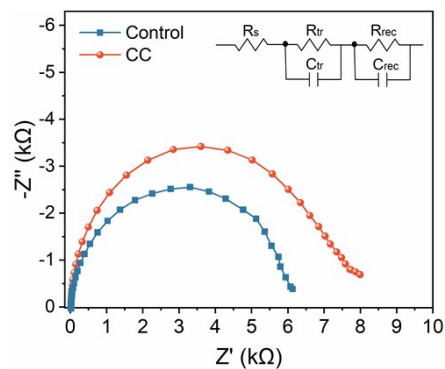

Figure S19. Nyquist plot of EIS measurements and the corresponding equivalent circuit model.

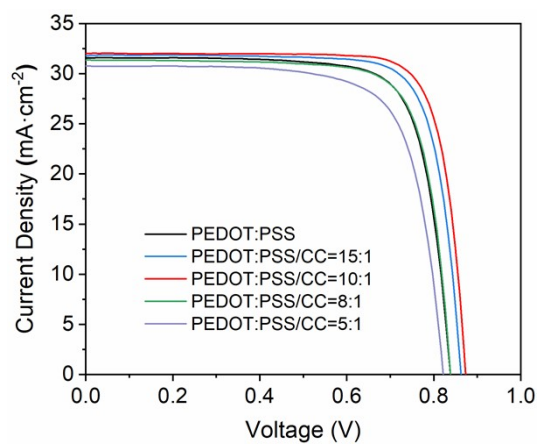

Figure S20. Photocurrent density-voltage ( $J$ - $V$ ) curves of perovskite solar cells with various CC solution concentrations.



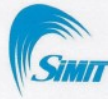

Report No. 23TR040603

**Sample Information**

|                         |                              |
|-------------------------|------------------------------|
| Sample Type             | Perovskite photovoltaic cell |
| Serial No.              | 2-4#                         |
| Lab Internal No.        | 23040602-1#                  |
| Measurement Item        | I-V characteristic           |
| Measurement Environment | 24.1±2.0°C, 34.3±5.0%RH      |

**Measurement of I-V characteristic**

|                                                          |                                                                                                                                                                                                                                                 |
|----------------------------------------------------------|-------------------------------------------------------------------------------------------------------------------------------------------------------------------------------------------------------------------------------------------------|
| Reference cell                                           | PVM1121                                                                                                                                                                                                                                         |
| Reference cell Type                                      | mono-Si, WPVS, calibrated by NREL (Certificate No. ISO 2075)                                                                                                                                                                                    |
| Calibration Value/Date of Calibration for Reference cell | 144.53mA/ Feb. 2023                                                                                                                                                                                                                             |
| Measurement Conditions                                   | Standard Test Condition (STC);<br>Spectral Distribution: AM1.5 according to IEC 60904-3 Ed.3,<br>Irradiance: 1000±50W/m <sup>2</sup> , Temperature: 25±2°C                                                                                      |
| Measurement Equipment/ Date of Calibration               | AAA Steady State Solar Simulator (YSS-T155-2M) / July.2022<br>IV test system (ADCMT 6246) / June. 2022<br>SR Measurement system (CEP-25ML-CAS) / April.2022<br>Measuring Microscope (MF-B2017C) / July.2022                                     |
| Measurement Method                                       | I-V Measurement:<br>Logarithmic sweep in both directions (Isc to Voc and Voc to Isc) during one flash based on IEC 60904-1:2006;<br>Spectral mismatch factor was calculated according to IEC 60904-7 and I-V correction according to IEC 60891. |
| Measurement Uncertainty                                  | Area: 1.0%(k=2); Isc: 1.9%(k=2); Voc: 1.0%(k=2);<br>Pmax: 2.4%(k=2); Eff: 2.5%(k=2)                                                                                                                                                             |

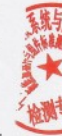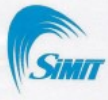

Report No. 23TR040603

**====Measurement Results====**

|      | Forward Scan<br>(Isc to Voc) | Reverse Scan<br>(Voc to Isc) |
|------|------------------------------|------------------------------|
| Area | 9.16 mm <sup>2</sup>         |                              |
| Isc  | 2.911 mA                     | 2.912 mA                     |
| Voc  | 0.866 V                      | 0.870 V                      |
| Pmax | 2.021 mW                     | 2.042 mW                     |
| Ipm  | 2.770 mA                     | 2.774 mA                     |
| Vpm  | 0.730 V                      | 0.736 V                      |
| FF   | 80.22 %                      | 80.60 %                      |
| Eff  | 22.06 %                      | 22.30 %                      |

- Spectral Mismatch Factor SMM=0.9933.
- Designated illumination area defined by a thin metal mask was measured by a measuring microscope.
- Test results listed in this measurement report refer exclusively to the mentioned test sample.
- The results apply only at the time of the test, and do not imply future performance.

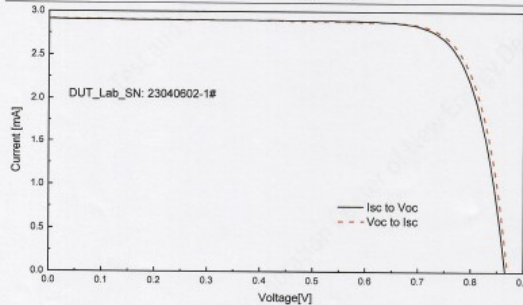

Fig.1 I-V curves of the measured sample

-----End of Report-----

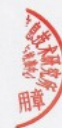

Figure S21. The Certification Report of the champion CCST device at Test and Calibration Center of the New Energy Device and Module, SIMIT, Chinese Academy of Sciences.

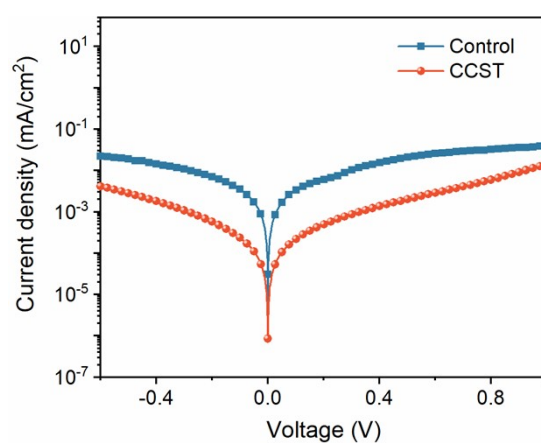

Figure S22. Dark  $J$ - $V$  curves of control and CCST devices.

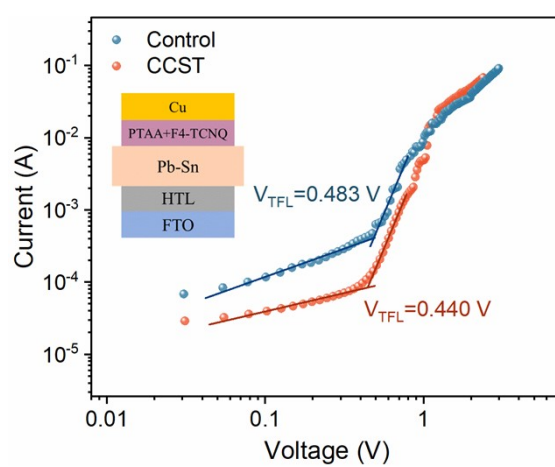

Figure S23. Space charge-limited current (SCLC) measurements of the hole-only devices.

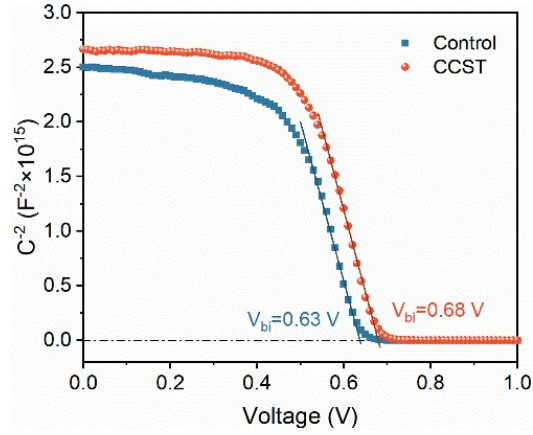

Figure S24. Mott-Schottky plots of control and CCST devices.

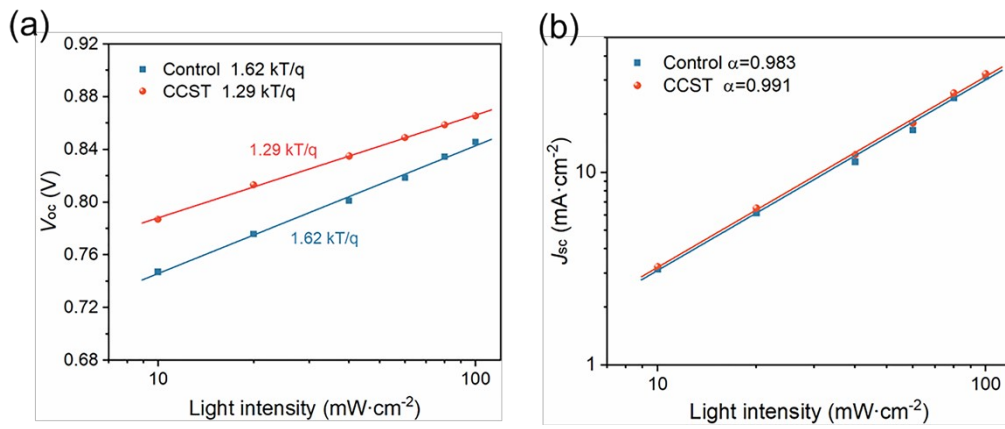

Figure S25. Light intensity dependence of control and CCST perovskite solar cells with (a)  $V_{oc}$  versus light intensity and (b)  $J_{sc}$  versus light intensity.

Table S1. Detailed information of S 2p XPS spectra for the control and CC- PEDOT:PSS films with and without DMF/DMSO treatment, respectively.

| Sample                | PSS                 |                     | PEDOT               |                     |                     |                     |
|-----------------------|---------------------|---------------------|---------------------|---------------------|---------------------|---------------------|
|                       | S 2p <sub>1/2</sub> | S 2p <sub>3/2</sub> | S 2p <sub>1/2</sub> | S 2p <sub>3/2</sub> | S 2p <sub>1/2</sub> | S 2p <sub>3/2</sub> |
| Control               | 168.85              | 167.66              | 164.89              | 163.48              | 162.50              | 161.54              |
| Control with DMF/DMSO | 168.74              | 167.58              | 164.67              | 163.44              | 162.36              | 161.36              |
| CC                    | 168.82              | 167.69              | 164.70              | 163.43              | 162.31              | 161.31              |
| CC with DMF/DMSO      | 168.76              | 167.68              | 164.71              | 163.41              | 162.33              | 161.32              |

Table S2. Fitting parameters for time-resolved PL decay curves.

| Sample       | $\tau_1$ (ns) | $A_1$ | $\tau_2$ (ns) | $A_2$ | $\tau_{\text{average}}$ (ns) |
|--------------|---------------|-------|---------------|-------|------------------------------|
| Pb-Sn/Quartz | 150.31        | 0.356 | 1178.73       | 0.525 | 1096.88                      |
| Control HTL  | 15.54         | 1.724 | 139.196       | 0.292 | 90.07                        |
| CC-HTL       | 16.58         | 1.618 | 232.35        | 0.219 | 157.86                       |

Table S3. PLQY and QFLS results of Pb-Sn perovskite film, perovskite/control HTL, and perovskite/CC-HTL half stack.

| <b>Sample</b>     | <b>PLQY</b> | <b>QFLS (eV)</b> |
|-------------------|-------------|------------------|
| Pb-Sn/Quartz      | 0.0617      | 0.921            |
| Pb-Sn/Control HTL | 0.0045      | 0.850            |
| Pb-Sn/CC-HTL      | 0.0179      | 0.889            |

Table S4. Fitting parameters of electrochemical impedance spectroscopy.

|                | <b><math>R_s</math> (<math>\Omega</math>)</b> | <b><math>R_{tr}</math> (<math>\Omega</math>)</b> | <b><math>R_{rec}</math> (<math>\Omega</math>)</b> |
|----------------|-----------------------------------------------|--------------------------------------------------|---------------------------------------------------|
| <b>Control</b> | 16.93                                         | 1439                                             | 5001                                              |
| <b>CC</b>      | 18.29                                         | 1189                                             | 6507                                              |

Table S5. Recently reported photovoltaic parameters of MA-free Sn-Pb PSCs.

| Device structure                                                                                                                                                    | $V_{oc}$ (V) | $J_{sc}$ (mA<br>$\cdot$ cm <sup>-2</sup> ) | FF(%) | PCE    | Ref  |
|---------------------------------------------------------------------------------------------------------------------------------------------------------------------|--------------|--------------------------------------------|-------|--------|------|
| ITO/PEDOT:PSS/Cs <sub>0.25</sub> FA <sub>0.75</sub> Pb <sub>0.6</sub> Sn <sub>0.4</sub> I <sub>3</sub> /<br>PCBM/BCP/Ag                                             | 0.88         | 30.78                                      | 82.72 | 22.41  | 7    |
| ITO/neutral PEDOT/Cs <sub>0.2</sub> FA <sub>0.8</sub> Pb <sub>0.5</sub> Sn <sub>0.5</sub> I <sub>3</sub> /<br>1,4-butylendiamine (BDA)/C <sub>60</sub> /BCP/Cu      | 0.88         | 32.0                                       | 82.0  | 23.1   | 8    |
| ITO/PEDOT:PSS/Cs <sub>0.25</sub> FA <sub>0.75</sub> Pb <sub>0.5</sub> Sn <sub>0.5</sub> I <sub>3</sub> /<br>OH-PEACI/PCBM/BCP/Ag                                    | 0.84         | 30.37                                      | 79.18 | 20.2   | 9    |
| ITO/PEDOT:PSS/<br>Cs <sub>0.3</sub> FA <sub>0.7</sub> Sn <sub>0.3</sub> Pb <sub>0.7</sub> I <sub>3</sub> /C <sub>60</sub> /BCP/Ag                                   | 0.787        | 29.1                                       | 79.9  | 18.3   | 10   |
| Glass/ITO/PEDOT:PSS/<br>FA <sub>0.83</sub> Cs <sub>0.17</sub> Pb <sub>0.5</sub> Sn <sub>0.5</sub> I <sub>3</sub> /C <sub>60</sub> /BCP/Ag.                          | 0.795        | 30.42                                      | 76.69 | 19.12  | 11   |
| ITO/ PEDOT:PSS<br>/FA <sub>0.83</sub> Cs <sub>0.135</sub> Rb <sub>0.035</sub> Sn <sub>0.5</sub> Pb <sub>0.5</sub> I <sub>3</sub> / C <sub>60</sub> /BCP/Cu          | 0.823        | 31.4                                       | 77.8  | 20.12  | 12   |
| ITO/P3CT-Cs/<br>FA <sub>0.8</sub> Cs <sub>0.2</sub> Pb <sub>0.18</sub> Sn <sub>0.82</sub> I <sub>3</sub> /C <sub>60</sub> /TPBi/Ag                                  | 0.86         | 31.55                                      | 73.64 | 20.01  | 13   |
| ITO/PEDOT:PSS/Cs <sub>0.25</sub> FA <sub>0.75</sub> Pb <sub>0.6</sub> Sn <sub>0.4</sub> I <sub>3</sub> with<br>D-HLH/PCBM/BCP/Ag                                    | 0.88         | 30.56                                      | 80.36 | 21.6   | 14   |
| ITO/PEDOT:PSS/SnOCl/<br>Cs <sub>0.2</sub> FA <sub>0.8</sub> Pb <sub>0.5</sub> Sn <sub>0.5</sub> I <sub>3</sub> /C <sub>60</sub> /BCP/Cu                             | 0.89         | 32.2                                       | 80.9  | 23.2   | 15   |
| ITO/CzAn/PMMA/Cs <sub>0.2</sub> FA <sub>0.8</sub> Pb <sub>0.5</sub> Sn <sub>0.5</sub> I <sub>3</sub> /C <sub>60</sub> /<br>BCP/Cu                                   | 0.87         | 32.64                                      | 79.62 | 22.6   | 16   |
| ITO/PEDOT:PSS/FA <sub>0.8</sub> Cs <sub>0.2</sub> Pb <sub>0.5</sub> Sn <sub>0.5</sub> I <sub>3</sub> /C <sub>60</sub> /<br>BCP/Cu                                   | 0.86         | 31.5                                       | 78.1  | 21.2   | 17   |
| ITO/resin particle/neutral PEDOT<br>/Cs <sub>0.2</sub> FA <sub>0.8</sub> Pb <sub>0.5</sub> Sn <sub>0.5</sub> I <sub>3</sub> /C <sub>60</sub> /SnO <sub>2</sub> /ITO | 0.85         | 30.2                                       | 76.4  | 19.6   | 18   |
| FTO/CC-PEDOT:PSS/<br>Rb <sub>0.03</sub> Cs <sub>0.2</sub> FA <sub>0.77</sub> Pb <sub>0.5</sub> Sn <sub>0.5</sub> I <sub>3</sub> /PCBM/C <sub>60</sub> /BCP/Cu       | 0.885        | 32.25                                      | 81.22 | 23.18  | This |
|                                                                                                                                                                     | 0.870        | 31.79                                      | 80.60 | 22.30* | work |

\* Certified efficiency

## References:

1. F. Neese, F. Wennmohs, U. Becker and C. Riplinger, *The Journal of Chemical Physics*, 2020, **152**, 224108.
2. Y. Zhao and D. G. Truhlar, *Theoretical Chemistry Accounts*, 2008, **120**, 215-241.
3. F. Weigend and R. Ahlrichs, *Physical Chemistry Chemical Physics*, 2005, **7**, 3297.
4. F. Weigend, *Physical Chemistry Chemical Physics*, 2006, **8**, 1057.
5. S. Grimme, J. Antony, S. Ehrlich and H. Krieg, *The Journal of Chemical Physics*, 2010, **132**, 154104.
6. W. Humphrey, A. Dalke and K. Schulten, *J. Mol. Graph.*, 1996, **14**, 33-38.
7. Z. Zhang, J. Liang, J. Wang, Y. Zheng, X. Wu, C. Tian, A. Sun, Y. Huang, Z. Zhou and Y. Yang, *Adv. Energy Mater.*, 2023, **13**, 2300181.
8. J. Wang, M. A. Uddin, B. Chen, X. Ying, Z. Ni, Y. Zhou, M. Li, M. Wang, Z. Yu and J. Huang, *Adv. Energy Mater.*, 2023, **13**, 2204115.
9. C. Tian, Z. Zhang, A. Sun, J. Liang, Y. Zheng, X. Wu, Y. Liu, C. Tang and C.-C. Chen, *Nano Energy*, 2023, **116**, 108848.
10. J. Tong, J. Gong, M. Hu, S. K. Yadavalli, Z. Dai, F. Zhang, C. Xiao, J. Hao, M. Yang and M. A. Anderson, *Matter*, 2021, **4**, 1365-1376.
11. T. Jiang, X. Xu, Z. Lan, Z. Chen, X. Chen, T. Liu, S. Huang and Y. M. Yang, *Nano Energy*, 2022, **101**, 107596.
12. F. Yang, R. W. MacQueen, D. Menzel, A. Musiienko, A. Al-Ashouri, J. Thiesbrummel, S. Shah, K. Prashanthan, D. Abou-Ras and L. Korte, *Adv. Energy Mater.*, 2023, 2204339.
13. W. Zhang, X. Li, S. Fu, X. Zhao, X. Feng and J. Fang, *Joule*, 2021, **5**, 2904-2914.
14. Z. Zhang, J. Liang, J. Wang, Y. Zheng, X. Wu, C. Tian, A. Sun, Z. Chen and C.-C. Chen, *Nano-Micro Lett*, 2022, **14**, 165.
15. Z. Yu, J. Wang, B. Chen, M. A. Uddin, Z. Ni, G. Yang and J. Huang, *Adv. Mater.*, 2022, **34**, 2205769.

16. J. Wang, Z. Yu, D. D. Astridge, Z. Ni, L. Zhao, B. Chen, M. Wang, Y. Zhou, G. Yang and X. Dai, *ACS Energy Lett.*, 2022, **7**, 3353-3361.
17. Z. Yu, X. Chen, S. P. Harvey, Z. Ni, B. Chen, S. Chen, C. Yao, X. Xiao, S. Xu and G. Yang, *Adv. Mater.*, 2022, **34**, 2110351.
18. B. Chen, Z. Yu, A. Onno, Z. Yu, S. Chen, J. Wang, Z. C. Holman and J. Huang, *Science Advances*, 2022, **8**.
